# Supplementary material for: Helicobacter pylori–induced matrix metallopeptidase-10 promotes gastric bacterial colonization and gastritis
Source: PubMed Central journal article supplement — Sci Adv. 2019 Apr 3;5(4):eaau6547. doi: 10.1126/sciadv.aau6547 (PMC6447374; doi:10.1126/sciadv.aau6547), 2019-04-03
Supplement: aau6547_SM.pdf [file aau6547_SM.pdf]

## Supplementary Materials for

### ***Helicobacter pylori*–induced matrix metalloproteinase-10 promotes gastric bacterial colonization and gastritis**

Yi-pin Lv, Ping Cheng, Jin-yu Zhang, Fang-yuan Mao, Yong-sheng Teng, Yu-gang Liu, Hui Kong, Xiao-long Wu, Chuan-jie Hao, Bin Han, Qiang Ma, Shi-ming Yang, Weisan Chen, Liu-sheng Peng, Ting-ting Wang, Quan-ming Zou, Yuan Zhuang\*

\*Corresponding author. Email: yuanzhuang1983@yahoo.com

Published 3 April 2019, *Sci. Adv.* **5**, eaau6547 (2019)

DOI: 10.1126/sciadv.aau6547

#### **This PDF file includes:**

- Fig. S1. MMP-10 is increased in gastric mucosa of *H. pylori*–infected patients and mice.
- Fig. S2. *H. pylori* and IL-22 synergistically induce gastric epithelial cells to express MMP-10.
- Fig. S3. MMP-10 increases bacterial burden and inflammation in gastric mucosa during *H. pylori* infection.
- Fig. S4. MMP-10 promotes CD8<sup>+</sup> T cell accumulation in gastric mucosa in vivo during *H. pylori* infection.
- Fig. S5. MMP-10 promotes CD8<sup>+</sup> T cell accumulation in gastric mucosa in vivo during *H. pylori* infection.
- Fig. S6. MMP-10 promotes CD8<sup>+</sup> T cell accumulation in gastric mucosa in vivo and migration in vitro during *H. pylori* infection by CXCL16.
- Fig. S7. MMP-10 impairs host defense and promotes the damage of gastric mucosa during *H. pylori* infection.
- Table S1. Clinical characteristics of patients.
- Table S2. Antibodies and other reagents.
- Table S3. Primer and probe sequences for real-time PCR analysis.

## Supplementary Figures

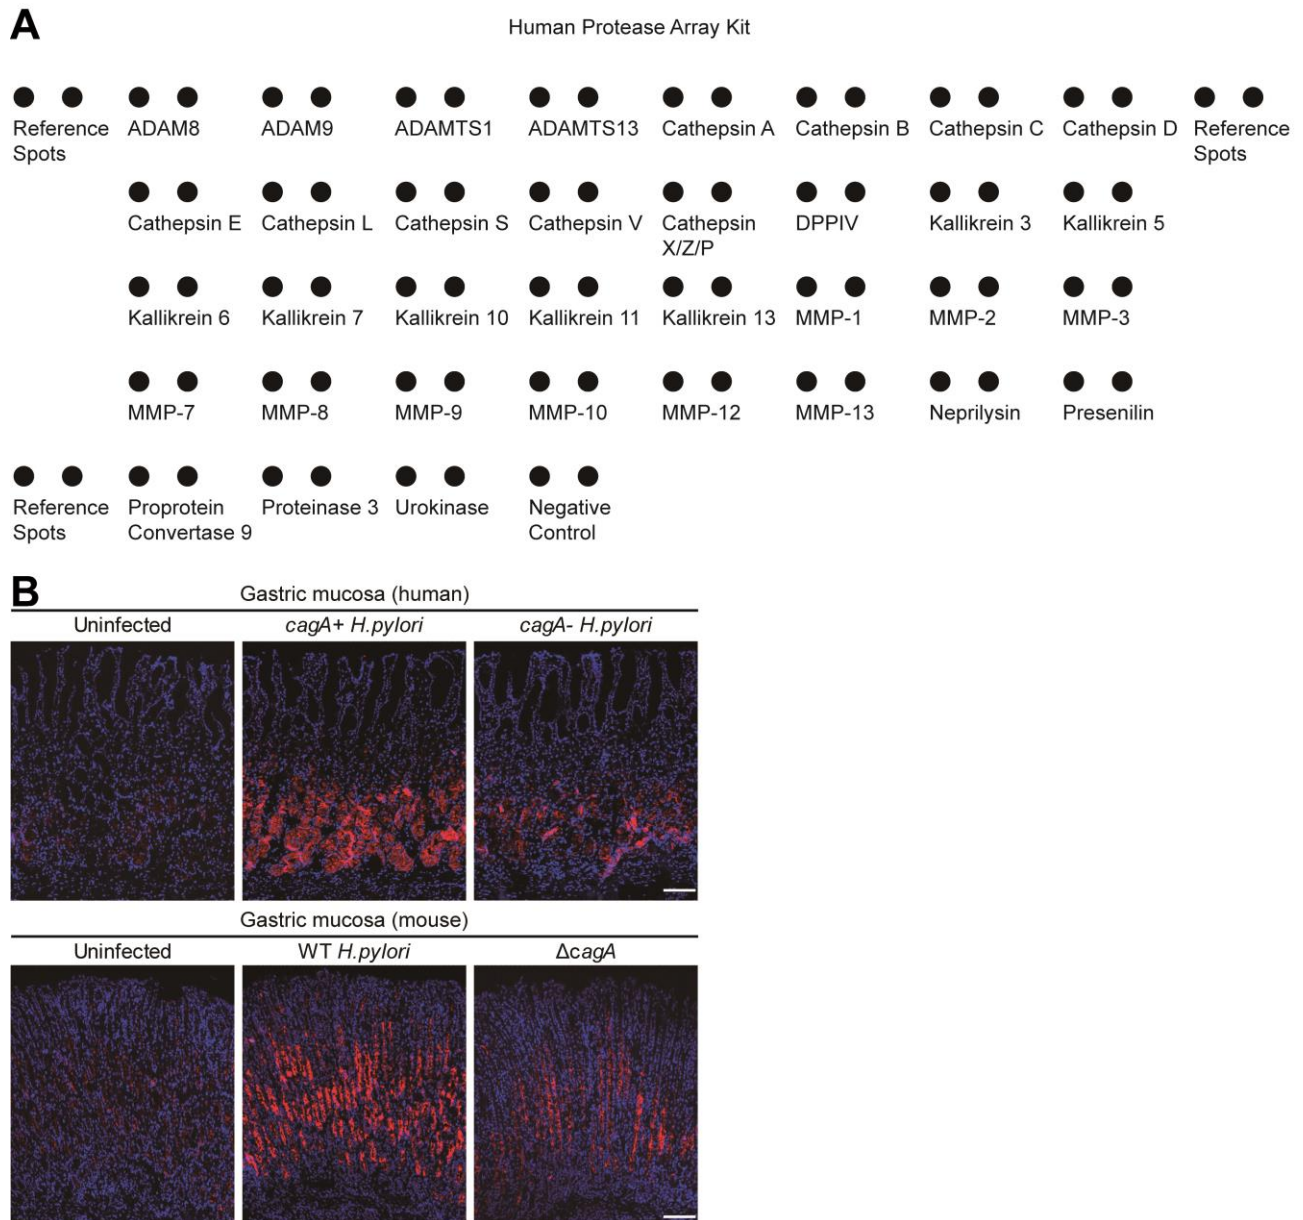

**Fig. S1. MMP-10 is increased in gastric mucosa of *H. pylori*-infected patients and mice. (A)**

Refer to the image for the Human Protease Array coordinates. **(B)** MMP-10 protein in gastric mucosa of *cagA*<sup>+</sup>*H. pylori*-infected, *cagA*<sup>-</sup>*H. pylori*-infected, and uninfected donors or in gastric mucosa of WT *H. pylori*-infected,  $\Delta$ *cagA*-infected, and uninfected mice at 9 week p.i. was analyzed by immunofluorescence staining. Scale bars: 100 microns. \*  $P < 0.05$ , \*\*  $P < 0.01$  for groups compared with uninfected mice.

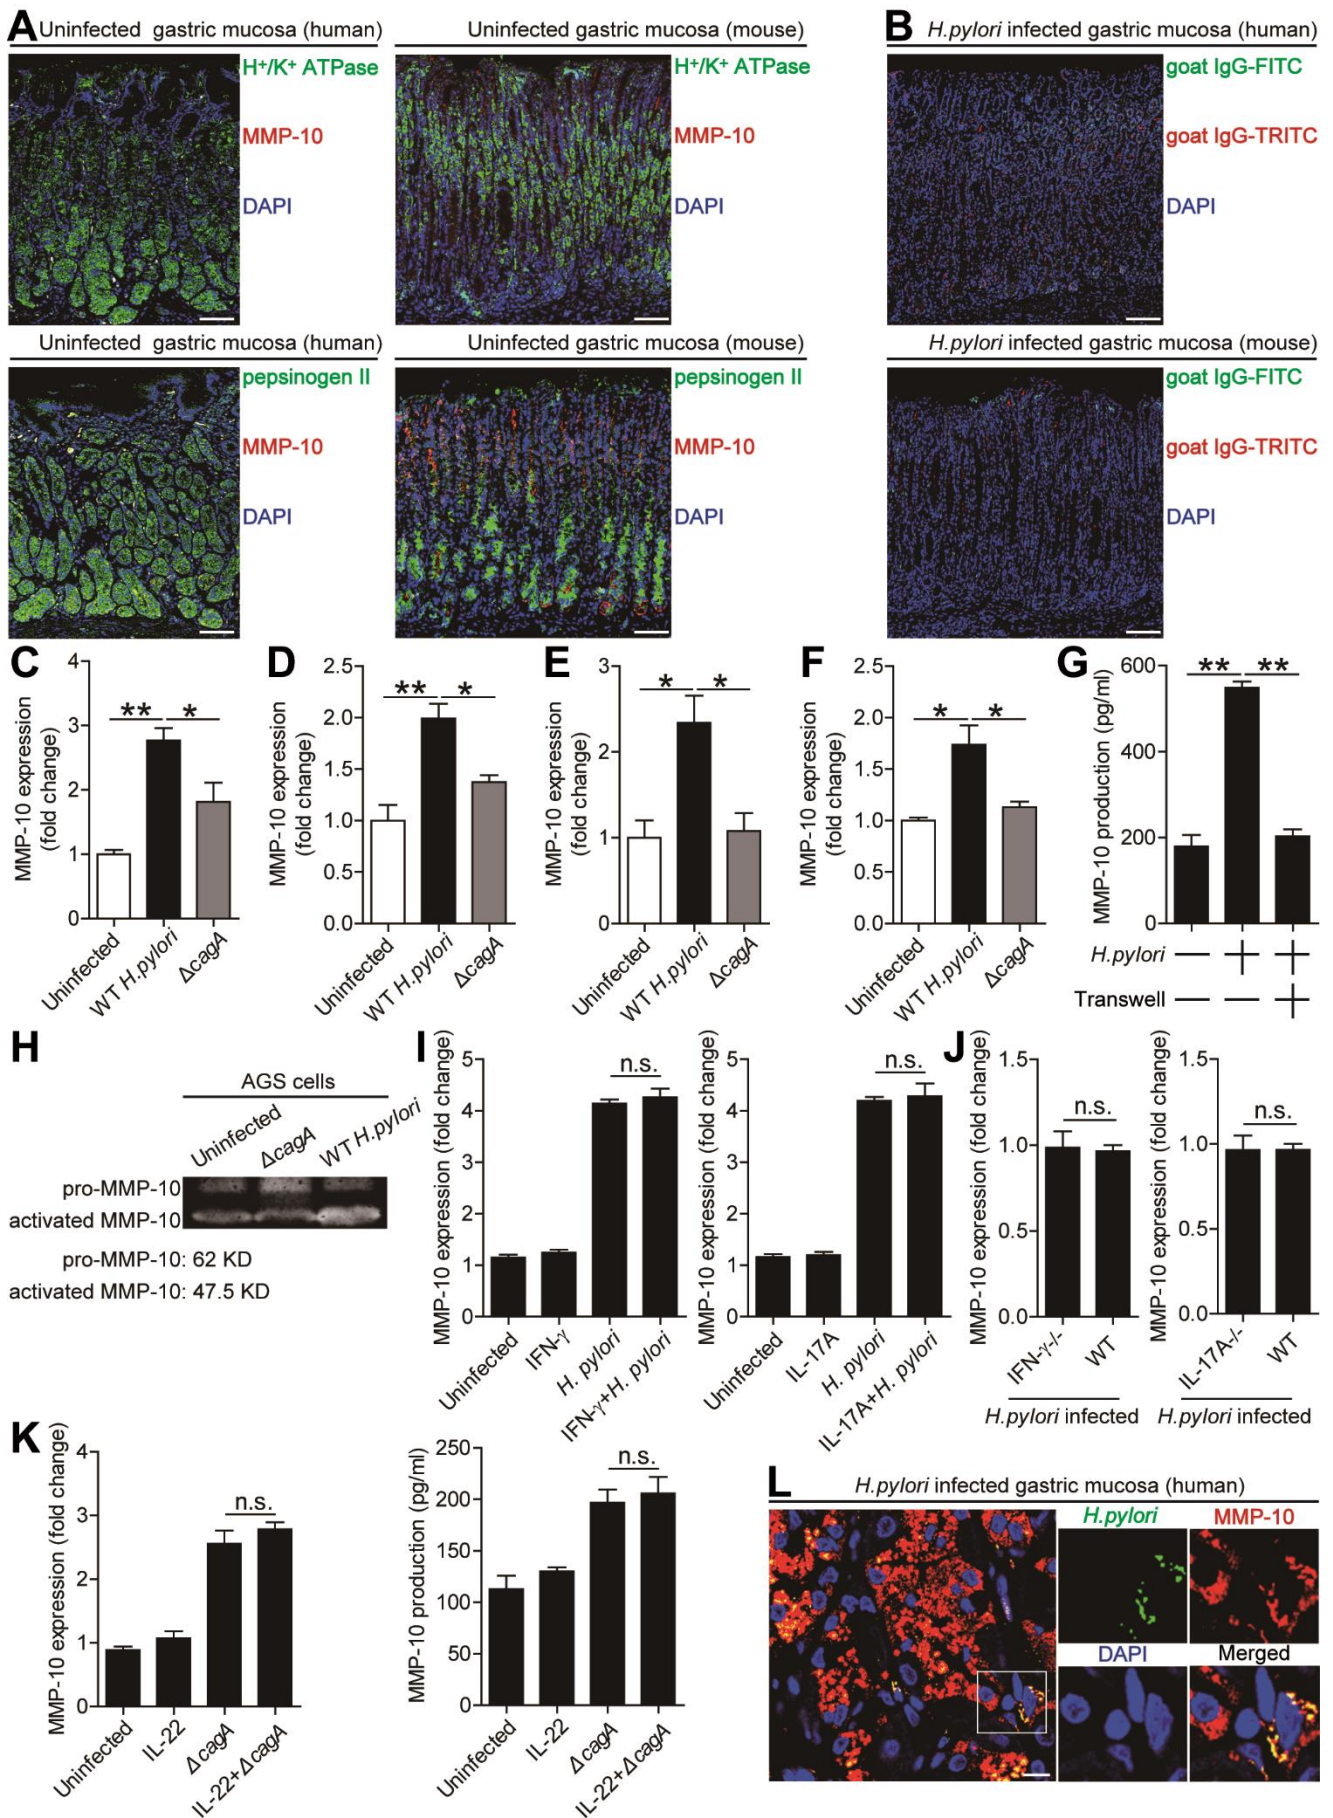

**Fig. S2. *H. pylori* and IL-22 synergistically induce gastric epithelial cells to express MMP-10.**

(A) Representative immunofluorescence staining images showing MMP-10-expressing (red) H<sup>+</sup>/K<sup>+</sup> ATPase<sup>+</sup> parietal cells (green) and MMP-10-expressing (red) pepsinogen II<sup>+</sup> chief cells (green) in gastric mucosa of uninfected donors or uninfected mice. Scale bars: 100 microns. (B) Representative immunofluorescence staining images showing only secondary antibody staining controls in gastric mucosa of *H. pylori*-infected patients or *H. pylori*-infected mice. Scale bars: 100 microns. (C-F) MMP-10 mRNA expression in WT *H. pylori*-infected,  $\Delta$ *cagA*-infected, and uninfected GES-1 cells (C), BGC-823 cells (D), HGC-27 cells (E), and SGC-7901 cells (F) (MOI=100, 24 h) was analyzed by real-time PCR (n=3). (G) The induction of MMP-10 production from AGS cells infected with WT *H. pylori* (MOI=100, 24 h) was assessed by transwell assay and analyzed by ELISA (n=3) as described in Materials and Methods. (H) Activated MMP-10 from AGS cells infected with WT *H. pylori* or  $\Delta$ *cagA* (MOI=100, 24 h) was assessed by casein-zymography assay as described in Materials and Methods. (I) MMP-10 mRNA expression in AGS cells stimulated with WT *H. pylori* (MOI=100) and/or IFN- $\gamma$ , or IL-17A (100 ng/ml) (24 h) was analyzed by real-time PCR (n=3). (J) MMP-10 mRNA expression in gastric mucosa of WT *H. pylori*-infected WT, IFN- $\gamma$ <sup>-/-</sup>, or IL-17A<sup>-/-</sup> mice at 9 week p.i. was compared (n=5). (K) MMP-10 mRNA expression and MMP-10 protein in/from AGS cells stimulated with  $\Delta$ *cagA* (MOI=100) and/or IL-22 (100 ng/ml) (24 h) was analyzed by real-time PCR and ELISA (n=3). (L) Representative immunofluorescence staining images showing MMP-10-expressing (red) cells and *H. pylori* (green) colonization in gastric mucosa of *H. pylori*-infected patients. Scale bars: 10 microns.\*  $P < 0.05$ , \*\*  $P < 0.01$ , n.s.  $P > 0.05$  for groups connected by horizontal lines.

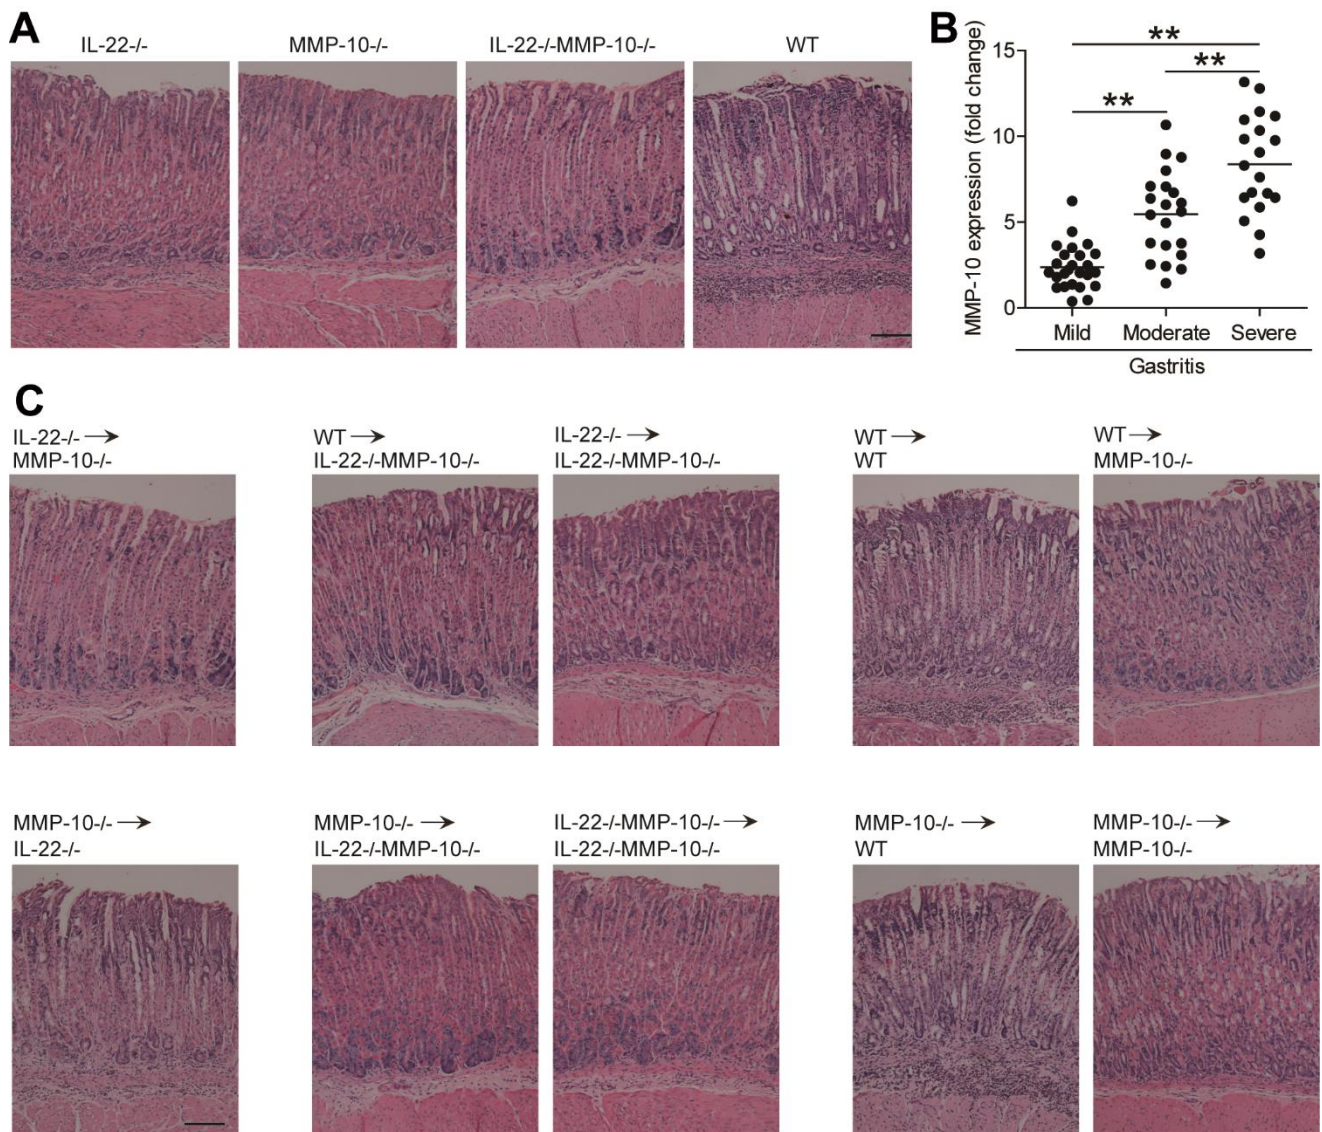

**Fig. S3. MMP-10 increases bacterial burden and inflammation in gastric mucosa during *H. pylori* infection.** (A) Representative H&E staining images showed inflammation in gastric antra of WT *H. pylori*-infected IL-22<sup>-/-</sup>, MMP-10<sup>-/-</sup>, IL-22<sup>-/-</sup>MMP-10<sup>-/-</sup>, and WT mice at 9 week p.i.. Scale bars: 100 microns. (B) MMP-10 mRNA expression in gastric mucosa of *H. pylori*-infected patients with mild (n=25), moderate (n=20), and severe inflammation (n=19) was compared. (C) Representative H&E staining images showed inflammation in gastric antra of WT *H. pylori*-infected BM chimera mice at 9 week p.i.. Scale bars: 100 microns. The horizontal bars in panel B represent mean values. Each dot in panel B represents 1 patient. \*\*  $P < 0.01$  for groups connected by horizontal lines.

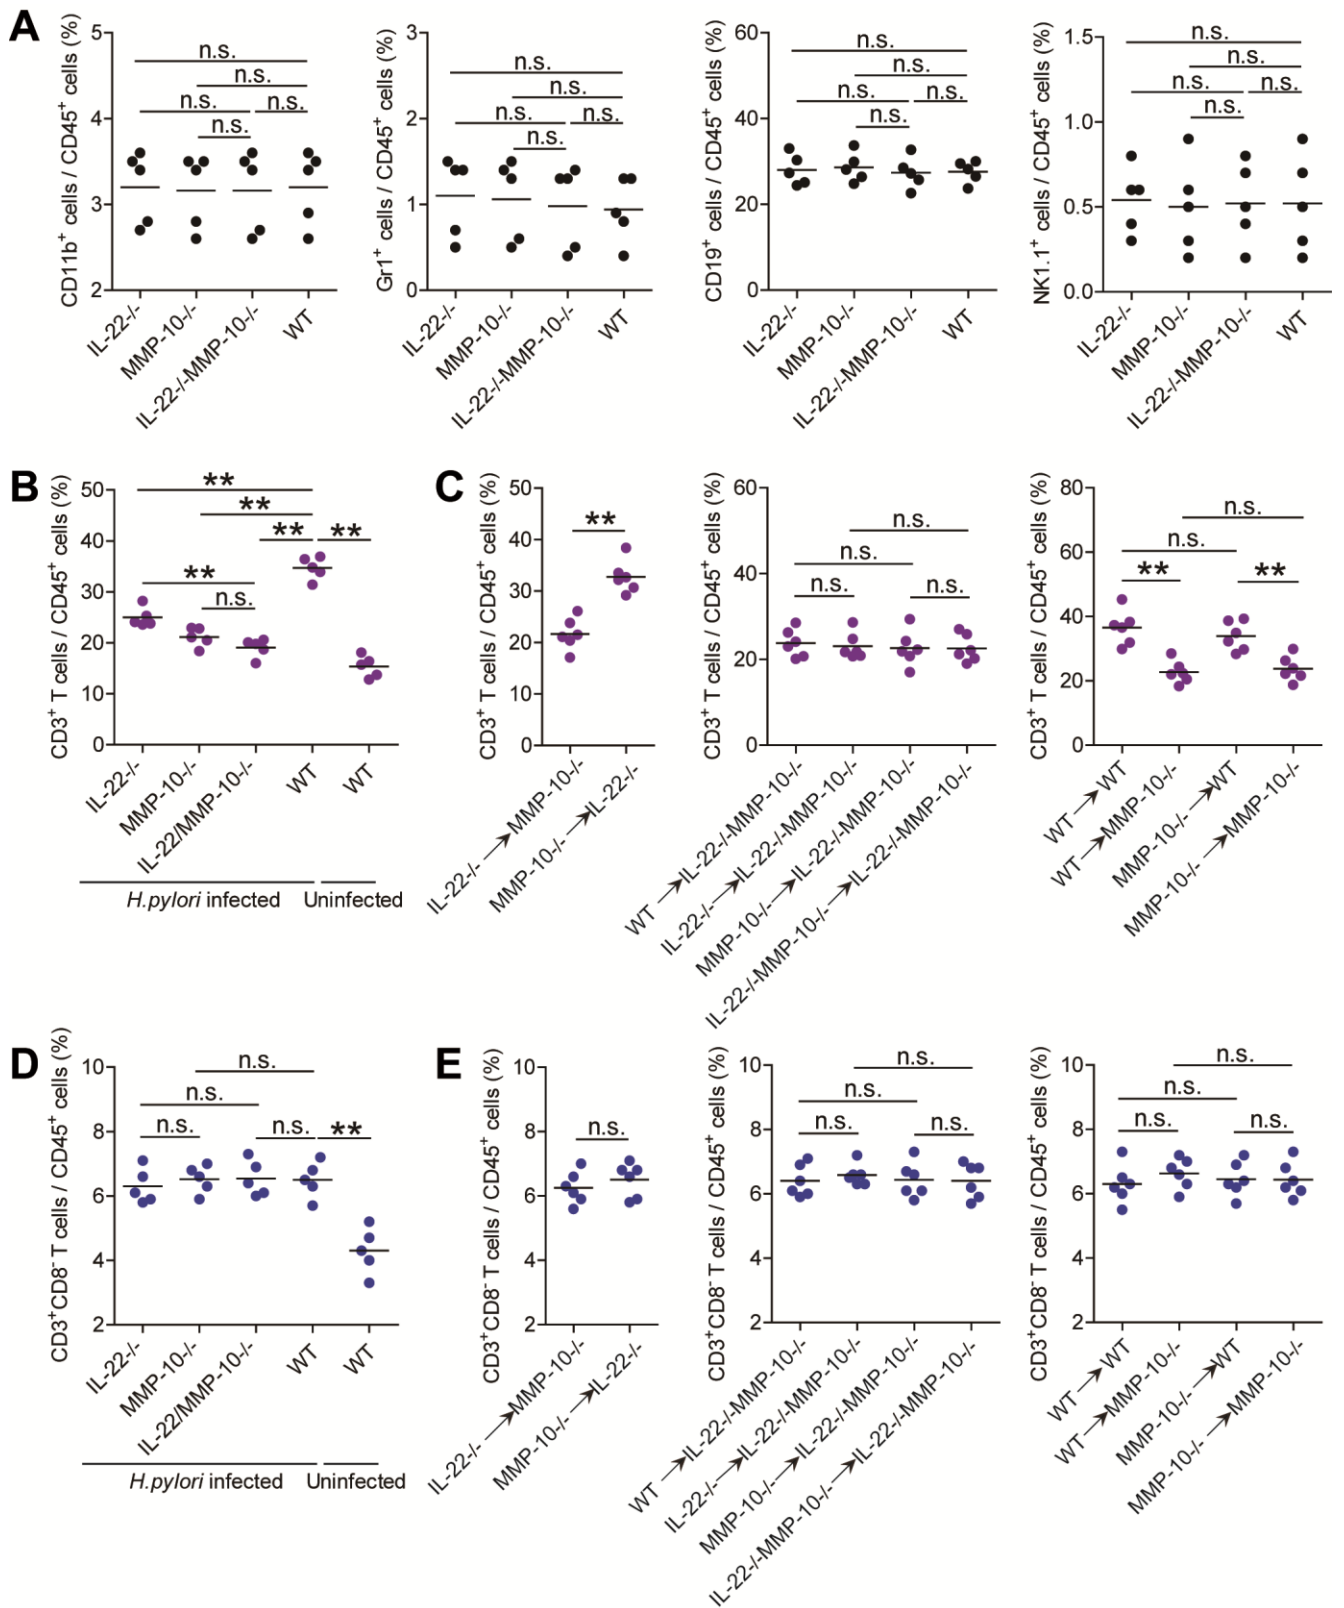

**Fig. S4. MMP-10 promotes CD8<sup>+</sup> T cell accumulation in gastric mucosa in vivo during *H.***

***pylori* infection.** (A) The levels of CD11b<sup>+</sup> monocytes, Gr1<sup>+</sup> neutrophils, CD3<sup>+</sup> T cells, CD19<sup>+</sup> B cells, and NK1.1<sup>+</sup> natural killer cells (NK cells) in gastric mucosa of WT *H. pylori*-infected IL-22<sup>-/-</sup>, MMP-10<sup>-/-</sup>, IL-22<sup>-/-</sup>MMP-10<sup>-/-</sup>, and WT mice at 9 week p.i. were compared (n=5). (B) CD3<sup>+</sup> cell level in

gastric mucosa of uninfected WT mice, and WT *H. pylori*-infected IL-22<sup>-/-</sup>, MMP-10<sup>-/-</sup>, IL-22<sup>-/-</sup>MMP-10<sup>-/-</sup>, and WT mice at 9 week p.i. was compared (n=5). **(C)** CD3<sup>+</sup> cell level in gastric mucosa of WT *H. pylori*-infected BM chimera mice at 9 week p.i. was compared (n=6). **(D)** CD3<sup>+</sup>CD8<sup>-</sup> cell level in gastric mucosa of uninfected WT mice, and WT *H. pylori*-infected IL-22<sup>-/-</sup>, MMP-10<sup>-/-</sup>, IL-22<sup>-/-</sup>MMP-10<sup>-/-</sup>, and WT mice at 9 week p.i. was compared (n=5). **(E)** CD3<sup>+</sup>CD8<sup>-</sup> cell level in gastric mucosa of WT *H. pylori*-infected BM chimera mice at 9 week p.i. was compared (n=6). The horizontal bars in panel A, B, C, D, and E represent mean values. Each dot in panel A, B, C, D, and E represents 1 mouse. \*\*  $P < 0.01$ , n.s.  $P > 0.05$  for groups connected by horizontal lines.

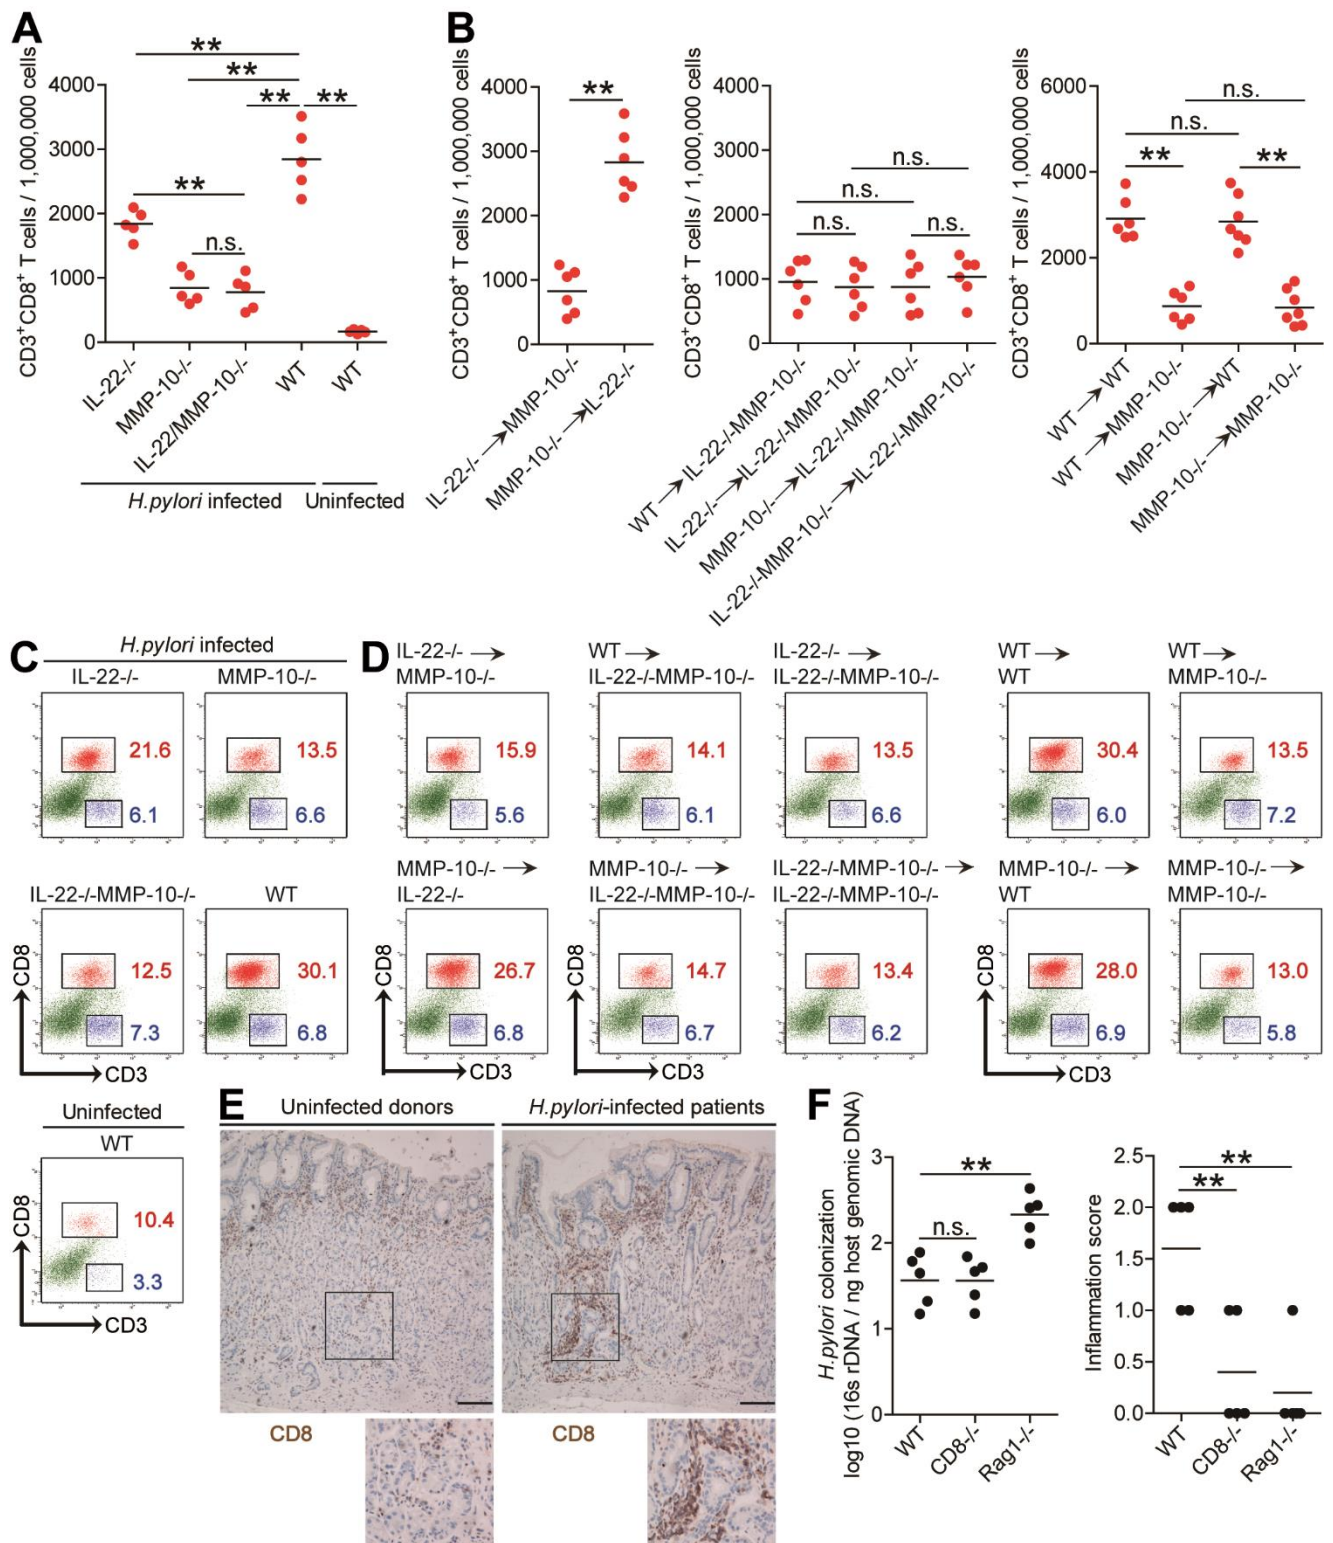

**Fig. S5. MMP-10 promotes CD8<sup>+</sup> T cell accumulation in gastric mucosa in vivo during *H. pylori* infection.** (A) CD3<sup>+</sup>CD8<sup>+</sup> cell number in gastric mucosa of uninfected WT mice, and WT *H. pylori*-infected IL-22<sup>-/-</sup>, MMP-10<sup>-/-</sup>, IL-22<sup>-/-</sup>MMP-10<sup>-/-</sup>, and WT mice at 9 week p.i. was compared (n=5). (B) CD3<sup>+</sup>CD8<sup>+</sup> cell number in gastric mucosa of WT *H. pylori*-infected BM chimera mice at 9 week p.i. was compared (n=6). (C) Representative dot plots of CD3<sup>+</sup>CD8<sup>+</sup> cells by gating on CD45<sup>+</sup> cells



in gastric mucosa of uninfected WT mice, and WT *H. pylori*-infected IL-22<sup>-/-</sup>, MMP-10<sup>-/-</sup>, IL-22<sup>-/-</sup>MMP-10<sup>-/-</sup>, and WT mice at 9 week p.i.. Red or blue numbers indicate relative percentages of CD3<sup>+</sup>CD8<sup>+</sup> cells or CD3<sup>+</sup>CD8<sup>-</sup> cells in CD45<sup>+</sup> cells. **(D)** Representative dot plots of CD3<sup>+</sup>CD8<sup>+</sup> cells by gating on CD45<sup>+</sup> cells in gastric mucosa of WT *H. pylori*-infected BM chimera mice at 9 week p.i.. Red or blue numbers indicate relative percentages of CD3<sup>+</sup>CD8<sup>+</sup> cells or CD3<sup>+</sup>CD8<sup>-</sup> cells in CD45<sup>+</sup> cells. **(E)** CD8<sup>+</sup> T cell infiltration in gastric mucosa of uninfected donors and *H. pylori*-infected patients was analyzed by immunohistochemical staining. Scale bars: 100 microns. **(F)** The bacteria colonization and the histological scores of inflammation in gastric mucosa of WT *H. pylori*-infected CD8<sup>-/-</sup>, Rag1<sup>-/-</sup>, and WT mice at 9 week p.i. were compared (n=5). The horizontal bars in panel A, B and F represent mean values. Each dot in panel A, B and F represents 1 mouse. \*  $P < 0.05$ , \*\*  $P < 0.01$ , n.s.  $P > 0.05$  for groups connected by horizontal lines.

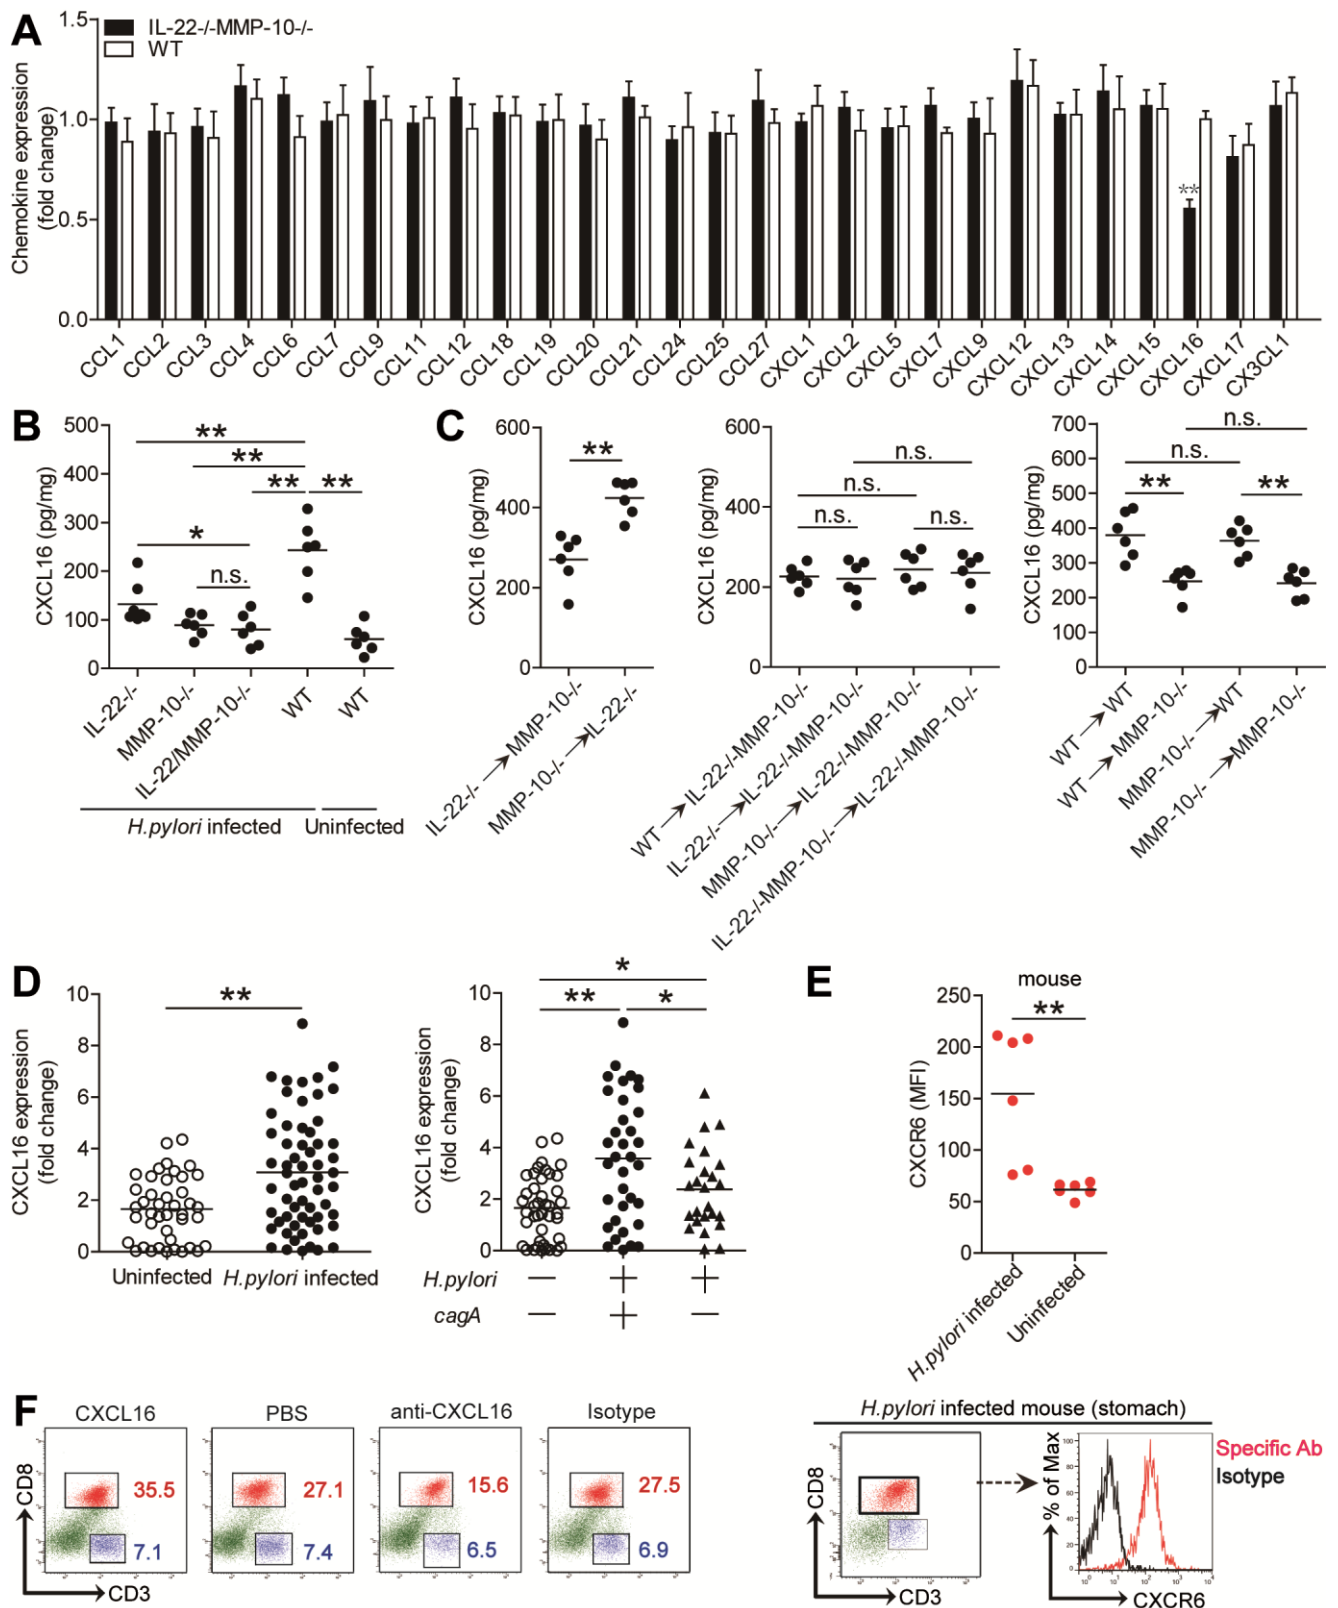

**Fig. S6. MMP-10 promotes CD8<sup>+</sup> T cell accumulation in gastric mucosa in vivo and migration in vitro during *H. pylori* infection by CXCL16.** (A) Chemokine mRNA expression in gastric mucosa of WT *H. pylori*-infected IL-22<sup>-/-</sup>MMP-10<sup>-/-</sup> and WT mice at 9 week p.i. was compared (n=5). (B and C) Concentrations of CXCL16 protein in gastric mucosa of uninfected WT mice, and

WT *H. pylori*-infected IL-22<sup>-/-</sup>, MMP-10<sup>-/-</sup>, IL-22<sup>-/-</sup>MMP-10<sup>-/-</sup>, and WT mice (B), or in gastric mucosa of WT *H. pylori*-infected BM chimera mice (C) at 9 week p.i. was compared (n=6). (D) CXCL16 mRNA expression in gastric mucosa of *H. pylori*-infected (n=62) and uninfected donors (n=42) was compared. CXCL16 mRNA expression in gastric mucosa of *cagA*<sup>+</sup>*H. pylori*-infected (n=35), *cagA*<sup>-</sup>*H. pylori*-infected (n=25), and uninfected donors (n=42) was compared. (E) Representative dot plots of CD3<sup>+</sup>CD8<sup>+</sup> cells by gating on CD45<sup>+</sup> cells, and CXCR6 expression on CD3<sup>+</sup>CD8<sup>+</sup> cells in stomach of WT *H. pylori*-infected mice at 9 week p.i.. CXCR6 levels on CD3<sup>+</sup>CD8<sup>+</sup> cells in stomach of WT *H. pylori*-infected and uninfected mice at 9 week p.i. were compared (n=6). (F) Representative dot plots of CD3<sup>+</sup>CD8<sup>+</sup> cells by gating on CD45<sup>+</sup> cells in gastric mucosa of WT *H. pylori*-infected WT mice injected with CXCL16 or PBS control, or Abs against CXCL16 or corresponding isotype control Ab at 9 week p.i.. Red or blue numbers indicate relative percentages of CD3<sup>+</sup>CD8<sup>+</sup> cells or CD3<sup>+</sup>CD8<sup>-</sup> cells in CD45<sup>+</sup> cells. The horizontal bars in panel B, C, D and E represent mean values. Each dot or ring in panel B, C, D and E represents 1 donor or mouse. \* *P*<0.05, \*\* *P*<0.01, n.s. *P*>0.05 for groups connected by horizontal lines, or compared with WT mice.

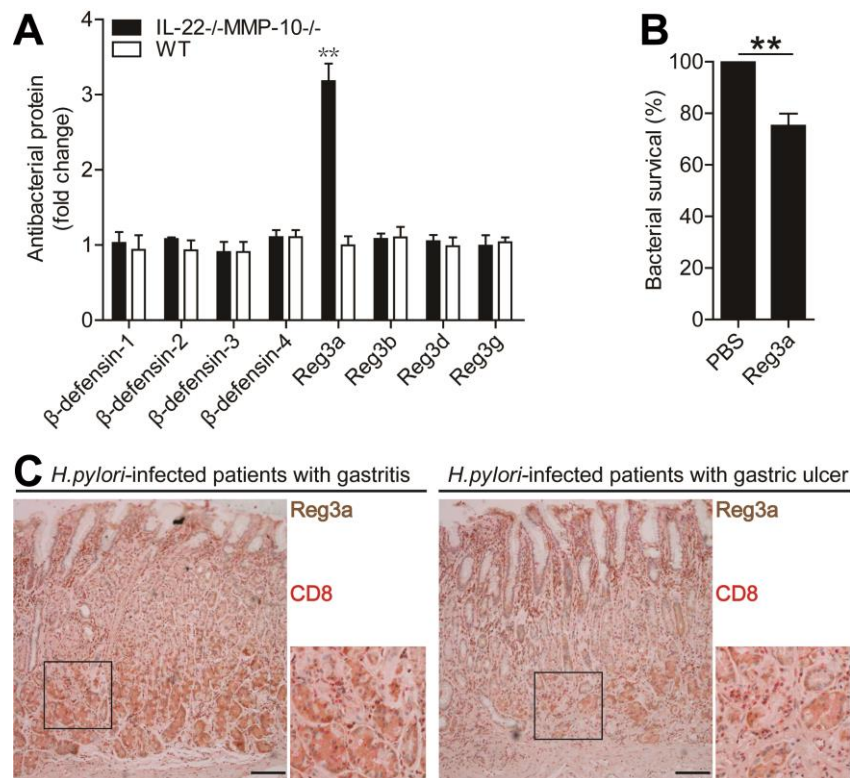

**Fig. S7. MMP-10 impairs host defense and promotes the damage of gastric mucosa during *H. pylori* infection.** (A) The mRNA expression of β-defensins and Reg3 proteins in gastric mucosa of

WT *H. pylori*-infected IL-22<sup>-/-</sup>MMP-10<sup>-/-</sup> and WT mice at 9 week p.i. was compared (n=5). **(B)** *In vitro* bactericidal assay was performed as described in Methods and statistically analyzed (n=5). The results was determined by counting colony-forming units (CFU) of alive bacteria with agar plating and expressed as the survival rate of WT *H. pylori* after incubation with Reg3a or PBS. **(C)** The Reg3a expression and CD8<sup>+</sup> T cell infiltration in gastric mucosa of *H.pylori*-infected patients with gastritis or gastric ulcer was analyzed by immunohistochemical staining. Scale bars: 100 microns. \*\*  $P < 0.01$  for groups connected by horizontal lines, or compared with WT mice.

**Table S1. Clinical characteristics of patients.**

| Variables           | <i>H. pylori</i> -infected | Uninfected             |
|---------------------|----------------------------|------------------------|
| Age (median, range) | (45 year, 20–72 years)     | (47 year, 25–69 years) |
| Sex (male/female)   | 55/41                      | 22/20                  |

Exclusion criteria were: previous treatment for *H. pylori* infection, use of inhibitors of acid secretion and/or antibiotics during the 2 months before the study, use of anticoagulant drugs in the last week, gastrointestinal malignancy, severe concomitant cardiovascular, respiratory or endocrine diseases, clinically significant renal or hepatic disease, haematological disorders, previous gastro-oesophageal surgery, history of allergy to any of the drug used in the study, pregnancy or lactation, alcohol abuse, drug addiction, severe neurological or psychiatric disorders, and long-term use of corticosteroids or anti-inflammatory drugs.

**Table S2. Antibodies and other reagents.**

| Antibodies and reagents                                      | Manufacturers           |
|--------------------------------------------------------------|-------------------------|
| Antibodies for flow cytometry                                |                         |
| anti-mouse CD45-PE-Cy7                                       | Biolegend               |
| anti-mouse CD3-APC                                           | Biolegend               |
| anti-mouse CD8-PerCP-Cy5.5                                   | Biolegend               |
| anti-mouse CD11b-PerCP-Cy5.5                                 | Biolegend               |
| anti-mouse Gr1-FITC                                          | Biolegend               |
| anti-mouse CD19-APC-Cy7                                      | Biolegend               |
| anti-mouse NK1.1-PE                                          | Biolegend               |
| anti-mouse CXCR6-FITC                                        | Biolegend               |
| anti-human CD45-PE-Cy7                                       | Biolegend               |
| anti-human CD3-APC                                           | Biolegend               |
| anti-human CD8-PerCP-Cy5.5                                   | Biolegend               |
| anti-human CXCR6-FITC                                        | Biolegend               |
| Antibodies for immunohistochemical staining                  |                         |
| rabbit anti-human/mouse MMP-10                               | Abcam                   |
| horseradish peroxidase anti-rabbit IgG                       | Zhongshan Biotechnology |
| mouse anti-human CD8                                         | Abcam                   |
| rabbit anti-human Reg3a                                      | Raybiotech              |
| Polymer Double Dyeing Detection Kit (Mo/HRP+Rb/AP)           | Zhongshan Biotechnology |
| Antibodies for immunofluorescence                            |                         |
| rabbit anti-human/mouse MMP-10                               | Abcam                   |
| mouse anti-human/mouse H <sup>+</sup> /K <sup>+</sup> ATPase | Abcam                   |
| rabbit anti-human/mouse pepsinogen II                        | Santa Cruz              |
| rabbit anti- <i>H. pylori</i>                                | Raybiotech              |
| goat anti-rabbit-TRITC                                       | Zhongshan Biotechnology |
| goat anti-rabbit-FITC                                        | Zhongshan Biotechnology |
| goat anti-mouse-TRITC                                        | Zhongshan Biotechnology |
| goat anti-mouse-FITC                                         | Zhongshan Biotechnology |
| Antibodies for neutralizing and blocking                     |                         |
| anti-human CXCL16 (Rat IgG2a)                                | R&D Systems             |
| anti-mouse CXCL16 (Rat IgG2a)                                | R&D Systems             |
| Rat IgG2a Isotype Control                                    | R&D Systems             |
| anti-human IL-22 (Goat IgG)                                  | R&D Systems             |
| anti-human IL-22 receptor alpha 1 (Goat IgG)                 | R&D Systems             |
| Goat IgG Control                                             | R&D Systems             |
| anti-mouse Reg3a (Rat IgG2a)                                 | Santa Cruz              |

|                                                        |                              |
|--------------------------------------------------------|------------------------------|
| Rat IgG2a Isotype Control                              | Santa Cruz                   |
| Antibodies for western blot                            |                              |
| rabbit anti-human/mouseMMP-10                          | Abcam                        |
| rabbit anti-human ERK1/2                               | Cell signaling technology    |
| rabbit anti-human p-ERK1/2                             | Cell signaling technology    |
| rabbit anti-human/mouse GAPDH                          | Beijing Ray Antibody Biotech |
| mouse anti-mouse E-cadherin                            | Abcam                        |
| rabbit anti-mouse zonula occludens-1                   | Abcam                        |
| ELISA kits                                             |                              |
| humanMMP-10                                            | Raybiotech                   |
| human CXCL16                                           | Raybiotech                   |
| mouse CXCL16                                           | Raybiotech                   |
| mouse Reg3a                                            | CUSABIO                      |
| Reagents for signaling pathways inhibition             |                              |
| MEK-1 and MEK-2 inhibitorU0126                         | Merk Millipore               |
| Ikbainhibitor BAY 11-7082                              | Calbiochem                   |
| JNK inhibitor SP600125                                 | Calbiochem                   |
| MAPK inhibitor SB203580                                | Calbiochem                   |
| GSK-3 $\beta$ inhibitor VI                             | Calbiochem                   |
| Human CD326 microbeads                                 | MilteniyBiotec               |
| Mouse CD326 microbeads                                 | MilteniyBiotec               |
| 5- $\mu$ m pore size Transwells                        | Corning                      |
| 0.4- $\mu$ m pore size Transwells                      | Corning                      |
| Collagenase IV                                         | Gibco                        |
| DNaseI                                                 | Sigma-Aldrich                |
| DMSO                                                   | Sigma-Aldrich                |
| Protein Extraction Reagent                             | Pierce                       |
| SuperSignal® West Dura Extended Duration Substrate kit | Thermo                       |
| Fetal bovine serum (FBS)                               | Gibco                        |
| Penicillin/Streptomycin                                | Gibco                        |
| RPMI-1640                                              | Hyclone                      |
| DMEM/F12 (1:1)                                         | Hyclone                      |
| Ficoll-Paque Plus                                      | GE Healthcare                |
| lyses solution                                         | TIANGEN                      |
| TRIzol reagent                                         | Invitrogen                   |
| Lipofectamine™ 3000 Transfection Reagent               | Invitrogen                   |

|                                                      |             |
|------------------------------------------------------|-------------|
| QIAamp DNA Mini Kit                                  | QIAGEN      |
| PrimeScript™ RT reagent Kit                          | TaKaRa      |
| Real-time PCR Master Mix                             | Toyobo      |
| Proteome Profiler Human Protease Array Kit           | R&D Systems |
| Casein-zymography                                    | GENMED      |
| Recombinant mouse Reg3a                              | R&D Systems |
| Recombinant human Reg3a                              | R&D Systems |
| All recombinant human/mouse cytokines and chemokines | PeptoTech   |

---

APC-Cy7, allophycocyanin-cyanin 7; PE-Cy7, phycoerythrin-cyanin 7; FITC, Fluorescein isothiocyanate; PE, phycoerythrin; PerCP-Cy5.5, peridinchlorophyl protein-cyanin 5.5; APC, allophycocyanin; IL, interleukin.



**Table S3. Primer and probe sequences for real-time PCR analysis.**

| Gene                          | Primer or probe | Sequence 5'→3'                  |
|-------------------------------|-----------------|---------------------------------|
| <i>H. pylori</i> 16s rDNA     | forward         | TTTGTTAGAGAAGATAATGACGGTATCTAAC |
|                               | reverse         | CATAGGATTTACACCTGACTGACTATC     |
|                               | probe           | CGTGCCAGCAGCCGCGGT              |
| Mouse $\beta$ 2-microglobulin | forward         | CCTGCAGAGTTAAGCATGCCAG          |
|                               | reverse         | TGCTTGATCACATGTCTCGATCC         |
|                               | probe           | TGGCCGAGCCCAAGACCGTCTAC         |
| <i>H. pylori</i> <i>cagA</i>  | forward         | GAGTCATAATGGCATAGAACCTGAA       |
|                               | reverse         | TTGTGCAAGAAATTCCATGAAA          |
| Mouse Sry                     | forward         | TGGGACTGGTGACAATTGTC            |
|                               | reverse         | GAGTACAGGTGTGCAGCTCT            |
| Human GAPDH                   | forward         | ACCCAGAAGACTGTGGATGG            |
|                               | reverse         | CAGTGAGCTTCCCGTTCAG             |
| Mouse $\beta$ -actin          | forward         | AGTGTGACGTTGACATCCGT            |
|                               | reverse         | GCAGCTCAGTAACAGTCCGC            |
| Human IL-22                   | forward         | GACAAGTCCAACTTCCAG              |
|                               | reverse         | GCTCACTCATACTGACTC              |
| Human MMP-10                  | forward         | GCTCTTTCACTCAGCCAACA            |
|                               | reverse         | TGCCATTACATCATCTTGC             |
| Mouse MMP-10                  | forward         | CCTGTGTTGTCTGTCTCTCCAAGA        |
|                               | reverse         | CGTGCTGACTGAATCAAAGGA           |
| Mouse CCL1                    | forward         | ATGGCACTGATGTGCCTGCT            |
|                               | reverse         | GGTGGAGGACTGAGGGAAA             |
| Mouse CCL2                    | forward         | TCACCTGCTGCTACTCATTCA           |
|                               | reverse         | CACTGTCACACTGGTCACTCC           |
| Mouse CCL3                    | forward         | TTCTCTGTACCATGACACTCTGC         |

|             |         |                       |
|-------------|---------|-----------------------|
|             | reverse | CGTGGAATCTTCCGGCTGTAG |
| Mouse CCL4  | forward | TGTCTGCCCTCTCTCTCCTCT |
|             | reverse | AGCAAGGACGCTTCTCAGTGA |
| Mouse CCL5  | forward | GCTGCTTTGCCTACCTCTCC  |
|             | reverse | TCGAGTGACAAACACGACTGC |
| Mouse CCL6  | forward | CCAAGACTGCCATTTTCATTC |
|             | reverse | AAGCAATGACCTTGTTCCCA  |
| Mouse CCL7  | forward | ATGGAAGTCTGCGCTGAAG   |
|             | reverse | ACATGAGGTCTCCAGAGCTTT |
| Mouse CCL8  | forward | ACGCTAGCCTTCACTCCAAAA |
|             | reverse | TTCCAGCTTTGGCTGTCTCTT |
| Mouse CCL9  | forward | TGGCATATCTGGCTTTGTCA  |
|             | reverse | ATGGCTGTAGCTCAAGATGGT |
| Mouse CCL11 | forward | TCCACAGCGCTTCTATTCCT  |
|             | reverse | GCAGTTCTTAGGCTCTGGGTT |
| Mouse CCL12 | forward | TCGAAGTCTTTGACCTCAACA |
|             | reverse | GGGAACTTCAGGGGGAAATA  |
| Mouse CCL19 | forward | ACTTGCACTTGGCTCCTGAA  |
|             | reverse | AGTCTTCCGCATCATTAGCA  |
| Mouse CCL20 | forward | GCAAGCGTCTGCTCTTCCTT  |
|             | reverse | TTAGGCTGAGGAGGTTCACCA |
| Mouse CCL21 | forward | GATGATGACTCTGAGCCTCCT |
|             | reverse | TTCTGCACCCAGCCTTCCT   |

---

|              |         |                             |
|--------------|---------|-----------------------------|
| Mouse CCL22  | forward | TGGCAATTCAGACCTCTGATG       |
|              | reverse | TTGCTGGAATGGCAGAAGAA        |
| Mouse CCL24  | forward | TCATCTTGCTGCACGTCCTTT       |
|              | reverse | TAAACCTCGGTGCTATTGCCA       |
| Mouse CCL25  | forward | TCTCAGGACCAGAAAGGCATT       |
|              | reverse | TGGCGGAAGTAGAATCTCACA       |
| Mouse CCL27  | forward | AGGCTGAGTGAGCATGATGGA       |
|              | reverse | TTGGCGTTCTAACCACCGA         |
| Mouse CCL28  | forward | GCTGTGTGTGTGGCTTTTCAA       |
|              | reverse | TACCTCTGAGGCTCTCATCCA       |
| Mouse CX3CL1 | forward | TGGCTTTGCTCATCCGCTATCAG     |
|              | reverse | CGTCTGTGCTGTGTCGTCTCC       |
| Mouse CXCL1  | forward | ACCCAAACCGAAGTCATAG         |
|              | reverse | TTGTATAGTGTTGTCAGAAGC       |
| Mouse CXCL2  | forward | ACTTCAAGAACATCCAGAG         |
|              | reverse | CTTCCAGGTCAGTTAGC           |
| Mouse CXCL3  | forward | CAGCCACACTCCAGCCTA          |
|              | reverse | CACAACAGCCCCTGTAGC          |
| Mouse CXCL4  | forward | AGCGATGGAGATCTTAGCTGTGT     |
|              | reverse | CCAGGCTGGTGATGTGCTTAA       |
| Mouse CXCL5  | forward | AGTCAAGAATCATTGGTTGTTAACCTT |
|              | reverse | TCCGGAGACAATGCAATAGTCA      |
| Mouse CXCL7  | forward | GGAGTTCACCTGTGCTGATGTGGA    |

---

|              |         |                            |
|--------------|---------|----------------------------|
|              | reverse | CACAGATGAAGCAGCTGGTCAGTAA  |
| Mouse CXCL9  | forward | ACAAATCCCTCAAAGACCTCAAACAG |
|              | reverse | ATCTCCGTTCTTCAGTGTAGCAATG  |
| Mouse CXCL10 | forward | TGAAAGCGTTTAGCCAAAAAAGG    |
|              | reverse | AGGGGAGTGATGGAGAGAGG       |
| Mouse CXCL12 | forward | CCTCCAAACGCATGCTTCA        |
|              | reverse | ACTCTCCTCCCTTCCATTGCA      |
| Mouse CXCL13 | forward | CAGGCCACGGTATTCTGGA        |
|              | reverse | CAGGGGGCGTAACTTGAATC       |
| Mouse CXCL14 | forward | GCTTCATCAAGTGGTACAAT       |
|              | reverse | CTGGCCTGGAGTTTTTCTTTCCAT   |
| Mouse CXCL15 | forward | CTAGGCATCTTCGTCCGTCC       |
|              | reverse | TTGGGCCAACAGTAGCCTTC       |
| Mouse CXCL16 | forward | AAACATTTGCCTCAAGCCAGT      |
|              | reverse | GTTTCTCATTTGCCTCAGCCT      |
| Mouse CXCL17 | forward | ATGAAGCTTCTAGCCTCTCCC      |
|              | reverse | CTATAAGGGCAGCGCAAAGCTTGC   |
| Mouse BD-1   | forward | GAACACGGTACACAGGCTTCC      |
|              | reverse | CCTGAATCACAGATGTCCAAG      |
| Mouse BD-2   | forward | CTCTCTGGAGTCTGAGTGCCC      |
|              | reverse | AGGACGCCTGGCAGAAGGAGG      |
| Mouse BD-3   | forward | TGCTGCTGTCTCCACCTGC        |
|              | reverse | AGTGTTGCCAATGCACCGAT       |

---

|             |         |                       |
|-------------|---------|-----------------------|
| Mouse BD-4  | forward | ACATGCATGACCAATGGAGCC |
|             | reverse | CATCTTGCTGGTTCTTC     |
| Mouse Reg3a | forward | CTGCTCTCCTGCCTGTTGTT  |
|             | reverse | GGAGCGATAAGCCTTGTAACC |
| Mouse Reg3b | forward | AGGCTTATGGCTCCTACTGCT |
|             | reverse | GAAGCCTCAGCGCTATTGAG  |
| Mouse Reg3g | forward | TGCCTATGGCTCCTATTGCT  |
|             | reverse | CATGGAGGACAGGAAGGAAG  |
| Mouse Reg3d | forward | CTGTCTTCTCCACGCATCAG  |
|             | reverse | CTGCTCCACTTCCATCCATT  |

---

For the probes, a FAM fluorescent reporter is coupled to the 5' end, and a TAMRA quencher is coupled to the 3' end. BD,  $\beta$ -defensin.
